# Supplementary material
Source: PubMed Central journal article supplement (PMC2954707)
Supplement: blood-2008-06-163048_1.pdf [file blood-2008-06-163048_1.pdf]

| Variable        | Trait         | Total | Percent |
|-----------------|---------------|-------|---------|
| Total           | Patients      | 26    | (100%)  |
| Sex             | Male          | 14    | ( 54%)  |
|                 | Female        | 12    | ( 46%)  |
| Race            | Caucasian     | 26    | (100%)  |
| Age             | 11 - 20       | 1     | ( 4%)   |
|                 | 31 - 40       | 3     | ( 12%)  |
|                 | 41 - 50       | 11    | ( 42%)  |
|                 | 51 - 60       | 8     | ( 31%)  |
|                 | 61 - 70       | 3     | ( 12%)  |
| ECOG            | 0             | 13    | ( 50%)  |
|                 | 1             | 6     | ( 23%)  |
|                 | Not Available | 7     | ( 27%)  |
| Disease         | Melanoma      | 26    | (100%)  |
| Prior Treatment | Surgery       | 19    | ( 73%)  |
|                 | Chemotherapy  | 9     | ( 35%)  |
|                 | Radiotherapy  | 7     | ( 27%)  |
|                 | Immunotherapy | 17    | ( 65%)  |
|                 | Any 2 or more | 18    | ( 69%)  |
|                 | Any 3 or more | 11    | ( 42%)  |
|                 | Not Available | 7     | ( 27%)  |
